# Supplementary material for: De novo adipocyte differentiation from Pdgfrβ+ preadipocytes protects against pathologic visceral adipose expansion in obesity
Source: PubMed Central journal article supplement (PMC5832777; doi:10.1038/s41467-018-03196-x), 2018-03-01
Supplement: 41467_2018_3196_MOESM2_ESM.pdf [file 41467_2018_3196_MOESM2_ESM.pdf]

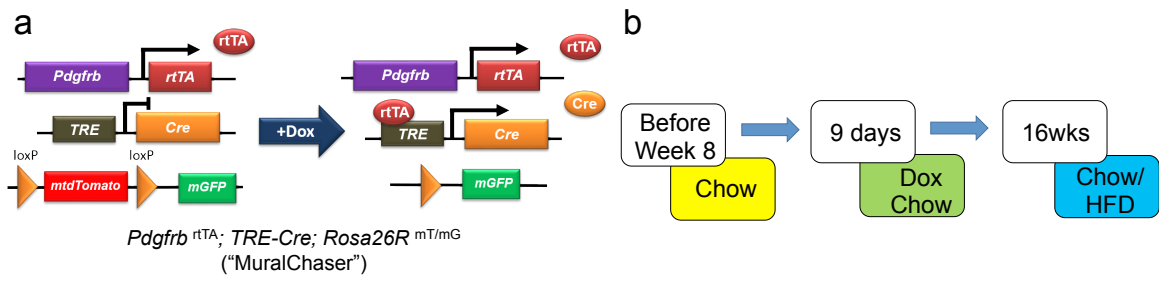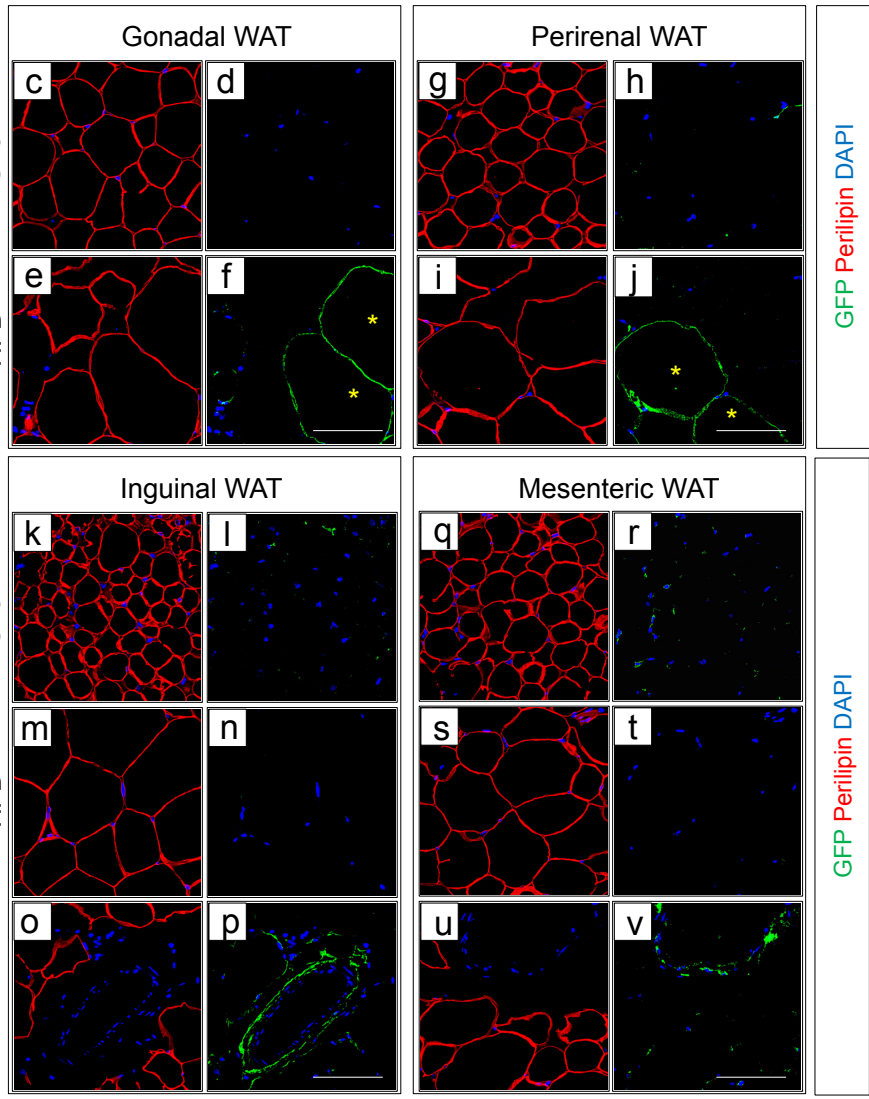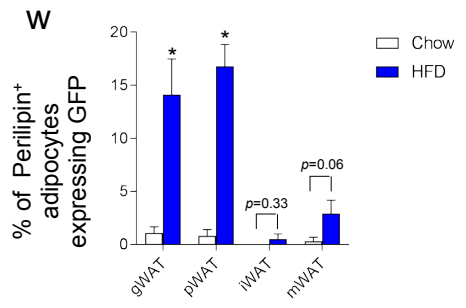

## Supplementary Figure 1: Depot-selective contribution of $Pdgfr\beta^+$ precursors to visceral adipogenesis in obesity

(a) The “MuralChaser” lineage tracing system is composed of *Pdgfrb*<sup>rtTA</sup>, *TRE-Cre*, and *Rosa26R*<sup>mT/mG</sup> transgenic genes. In the presence of doxycycline (Dox), rtTA becomes transcriptionally active; active rtTA drives Cre expression and permanent activation of mGFP expression in  $Pdgfr\beta^+$  cells and descending cells.

(b) “Pulse-chase” lineage tracing approach. Muralchaser mice were fed on a standard chow diet until 8 weeks of age before being switched to dox-containing chow diet (600 mg/kg) for 9 days (“pulse”). Mice were then maintained on regular chow or HFD (devoid of Dox) for another 16 weeks (“chase”) before adipose depots were harvested for paraffin sectioning. Processed paraffin sections were stained with anti-GFP (green) and anti-Perilipin (red) antibodies and counterstained with DAPI (blue; nuclei).

(c-f) Representative 63x magnification confocal immunofluorescence images of gonadal WAT sections after the “chase” period. \* indicates GFP-labeled perilipin-positive cells. Scale bar, 50  $\mu$ m.

(g-j) Representative 63x magnification confocal immunofluorescence images of perirenal WAT sections after the “chase” period. \* indicates GFP-labeled perilipin-positive cells. Scale bar, 50  $\mu$ m.

(k-p) Representative 63x magnification confocal immunofluorescence images of inguinal WAT sections after the “chase” period. Scale bar, 50  $\mu$ m.

(q-v) Representative 63x magnification confocal immunofluorescence images of mesenteric WAT sections after the “chase” period. Scale bar, 50  $\mu$ m.

(w) Percentage of perilipin-positive adipocytes expressing GFP in the indicated fat depots. Welch’s t-test, \* $p < 0.05$ ;  $n = 12$  randomly chosen 60x magnification fields from 2 individual reporter animals. Bars represent mean  $\pm$  s.e.m.

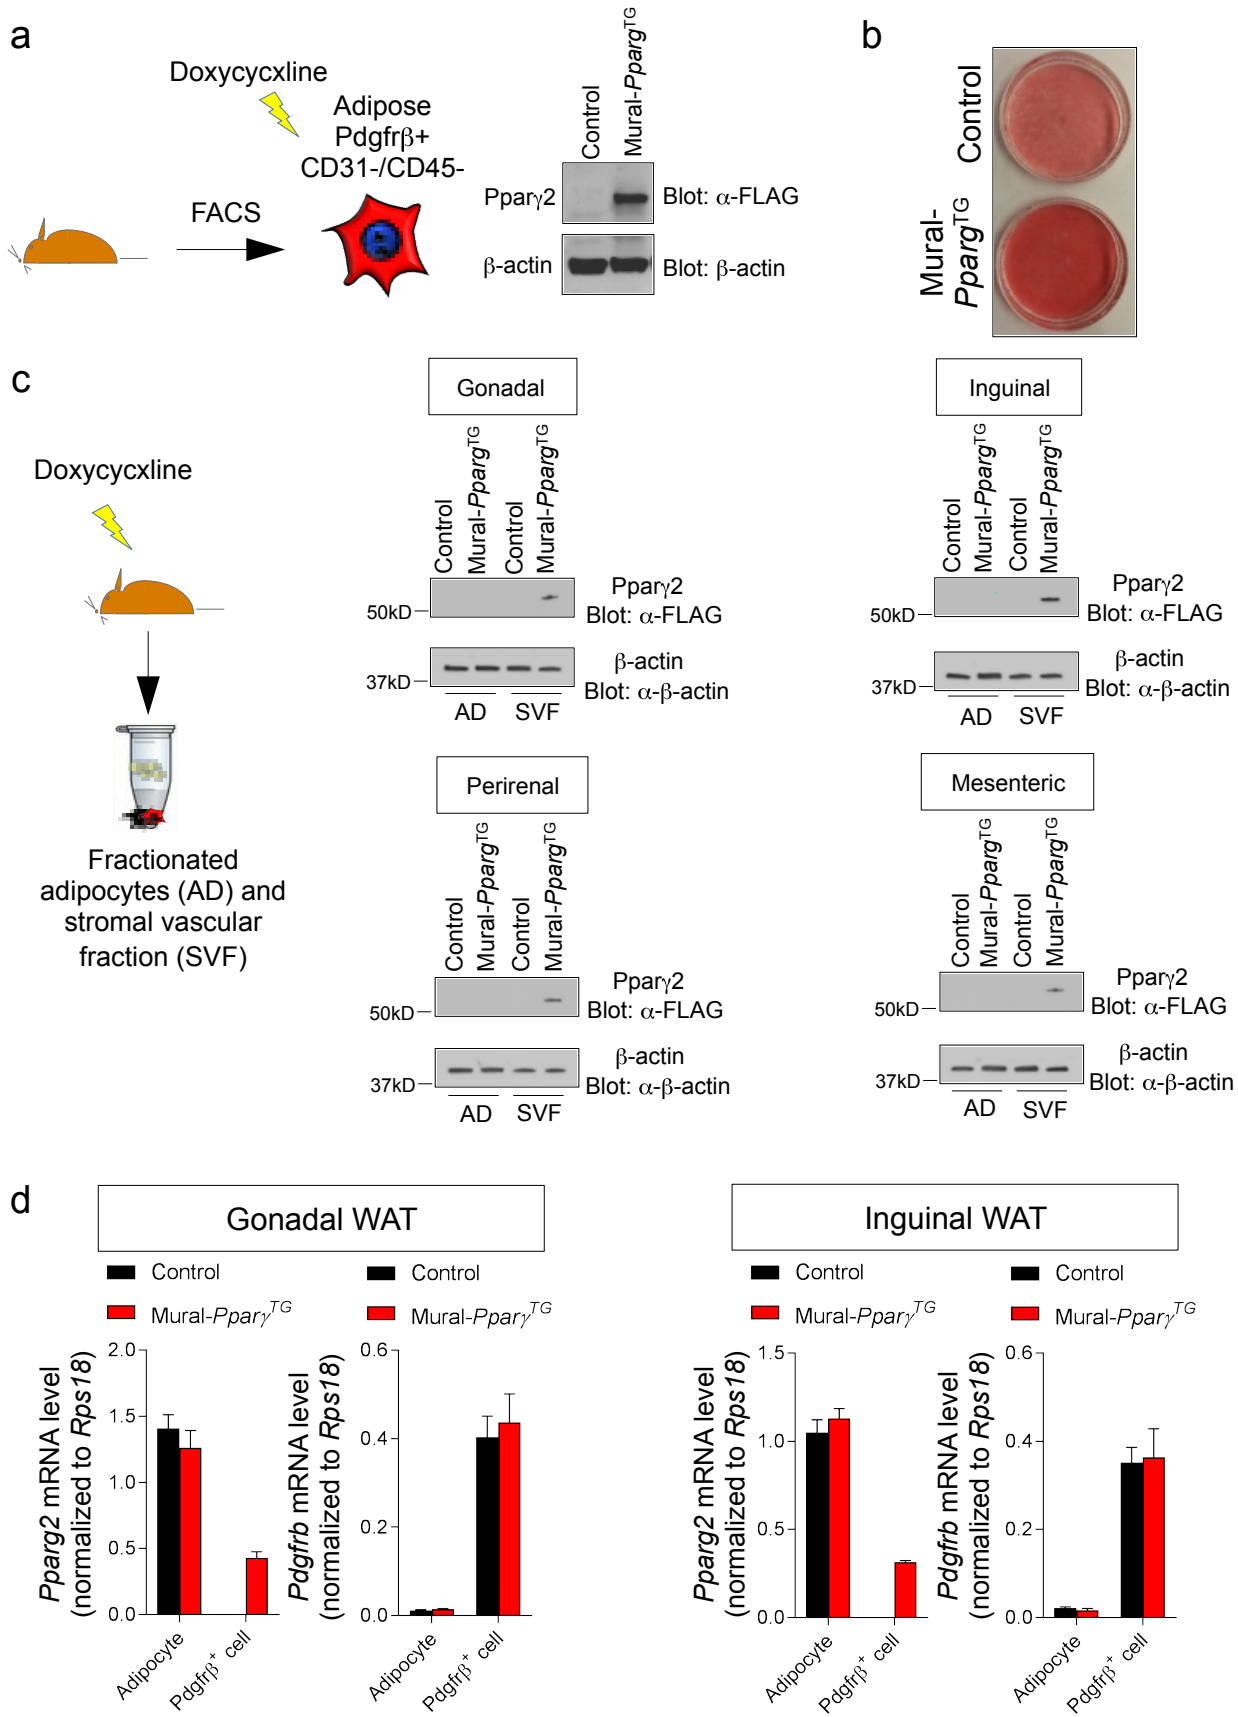

**Supplementary Figure 2: Doxycycline-inducible overexpression of *Pparg* in mural cells.**

**(a)**  $\text{Pdgfr}\beta^+$ ;  $\text{CD45}^-$ ;  $\text{CD31}^-$  cells were isolated from iWAT of 8 weeks-old control and Mural-*Pparg*<sup>TG</sup> mice fed on standard chow diet. Following the exposure of cells to doxycycline (10  $\mu\text{g/ml}$ ) for 48 hours *in vitro*, FLAG-tagged Ppar $\gamma$ 2 protein expression in the cultured cells was determined by immunoblotting.

**(b)** Oil red staining of adipocytes (differentiation day 5) differentiated from iWAT  $\text{Pdgfr}\beta^+$ ;  $\text{CD45}^-$ ;  $\text{CD31}^-$  cells isolated and treated as described in **(a)**.

**(c)** Stromal vascular fraction (SVF) and adipocytes (AD) were fractionated from the indicated WAT depots of 8 weeks-old control and Mural-*Pparg*<sup>TG</sup> mice after 7 days of chow diet feeding containing doxycycline. FLAG-tagged Ppar $\gamma$ 2 protein levels were determined by immunoblotting.

**(d)** mRNA levels of *Pparg2* and *Pdgfrb* in fractionated adipocytes and  $\text{Pdgfr}\beta^+$ ;  $\text{CD45}^-$ ;  $\text{CD31}^-$  cells isolated from gonadal and inguinal WAT of control and Mural-*Pparg*<sup>TG</sup> animals after 7 days of chow diet feeding containing doxycycline. \* denotes  $p < 0.05$  from Welch's t-test.  $n = 3$  per genotype. Bars represent mean  $\pm$  s.e.m.



**a**

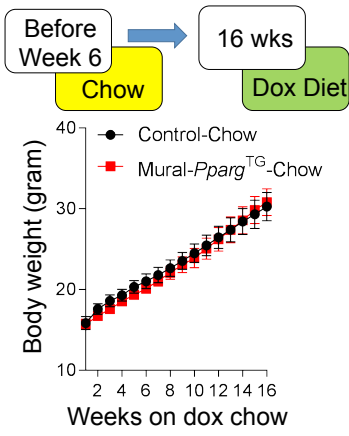

**b**

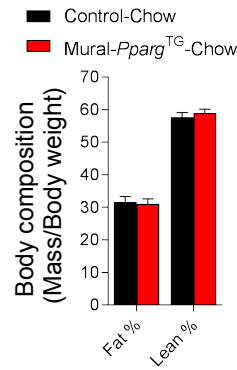

**c**

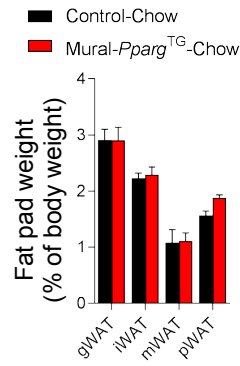

**d**

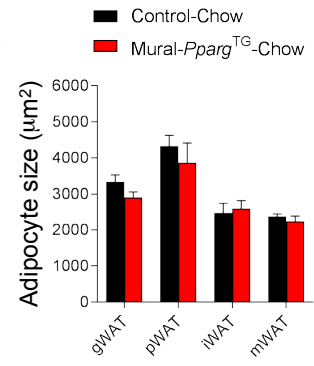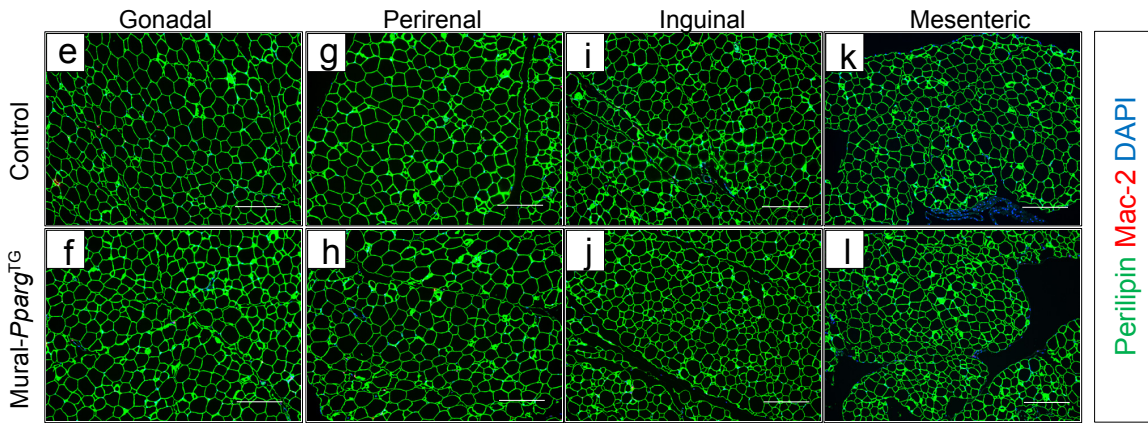

**m**

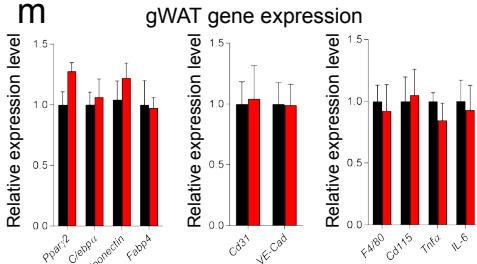

**n**

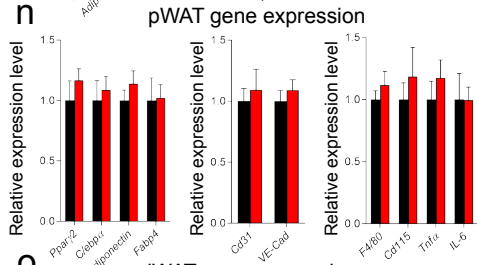

**o**

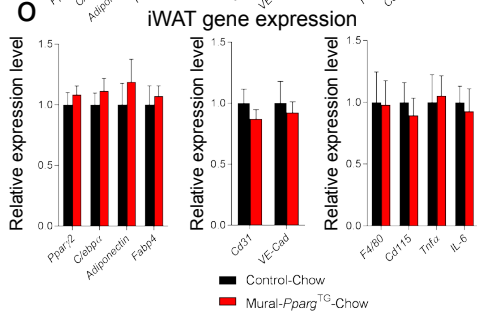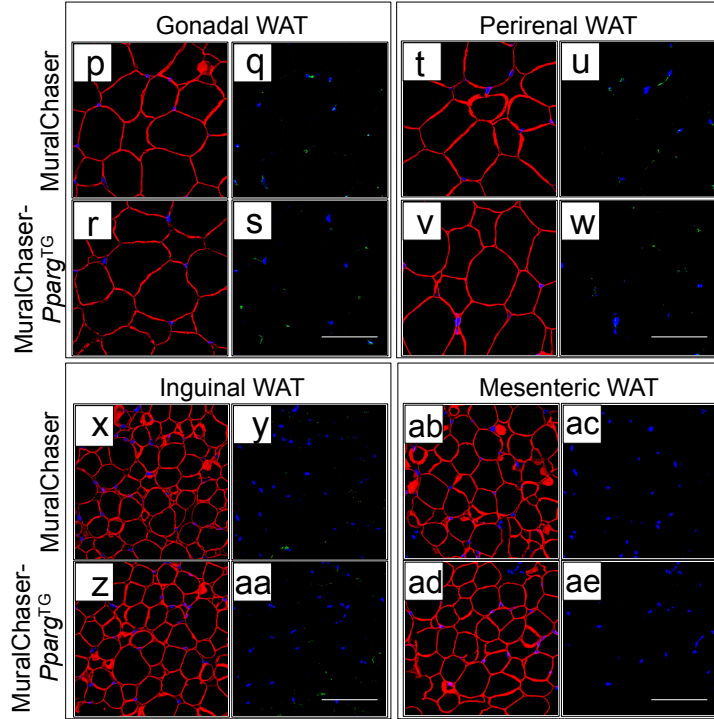

GFP Perilipin DAPI

### Supplementary Figure 3: Mural *Pparg* overexpression does not drive adipocyte hyperplasia in lean mice

**(a)** Control and Mural-*Pparg*<sup>TG</sup> mice were fed a standard chow diet until 6 weeks of age before being switched to dox-containing chow diet. Body weights were measured weekly following the onset of doxycycline treatment. n=7 per genotype. Data points represent mean  $\pm$  s.e.m.

**(b)** Fat mass and lean mass (normalized to body weight) of control and Mural-*Pparg*<sup>TG</sup> mice after 16 weeks of dox-chow feeding. n=7 per genotype. Bars represent mean  $\pm$  s.e.m.

**(c)** Fat pad weight (normalized to body weight) of control and Mural-*Pparg*<sup>TG</sup> mice after 16 weeks of dox-chow feeding. n=7 per genotype. Bars represent mean  $\pm$  s.e.m.

**(d)** Average adipocyte size in indicated fat depots from control and Mural-*Pparg*<sup>TG</sup> mice after 16 weeks of dox-chow feeding. n=6 per genotype. Bars represent mean  $\pm$  s.e.m.

**(e-l)** Representative immunofluorescence staining of Perilipin (green) and Mac-2 (red) in **(e-f)** gonadal, **(g-h)** perirenal, **(i-j)** inguinal and **(k-l)** mesenteric WAT paraffin sections obtained from control and Mural-*Pparg*<sup>TG</sup> mice after 16 weeks of dox-chow feeding. Scale bar, 200  $\mu$ m.

**(m-o)** Relative mRNA levels of indicated genes in **(m)** gonadal, **(n)** perirenal and **(o)** inguinal WAT obtained from control and Mural-*Pparg*<sup>TG</sup> mice after 16 weeks of dox-chow diet feeding. n=6 per genotype. Bars represent mean  $\pm$  s.e.m.

**(p-ae)** Control (MuralChaser) or MuralChaser-*Pparg*<sup>TG</sup> mice were kept on standard chow diet until 6 weeks of age before being switched to dox-containing chow diet for another 16 weeks. Fat depots were then harvested for paraffin sectioning. Processed paraffin sections were stained with anti-GFP (green) and anti-perilipin (red) and counterstained with DAPI (blue; nuclei). Representative 63x magnification confocal immunofluorescence images of **(p-s)** gonadal, **(t-w)** perirenal, **(x-aa)** inguinal and **(ab-ae)** mesenteric WAT sections after 16 weeks of dox-chow feeding. Scale bar, 50  $\mu$ m.

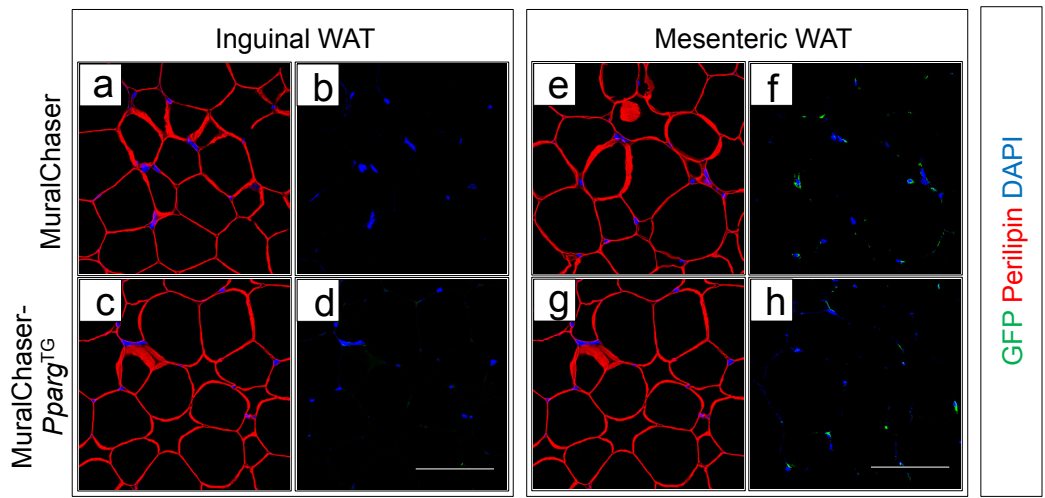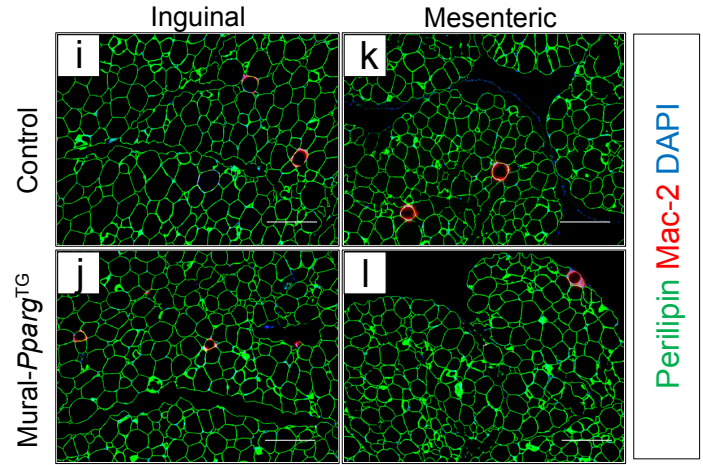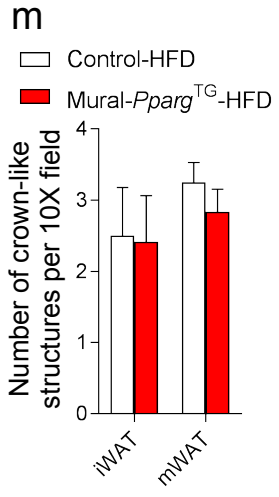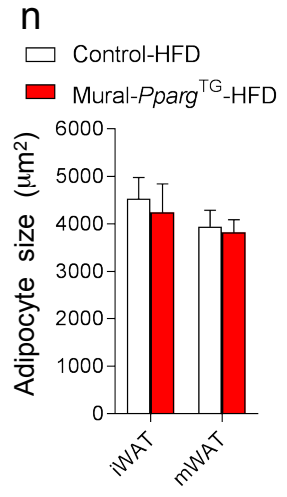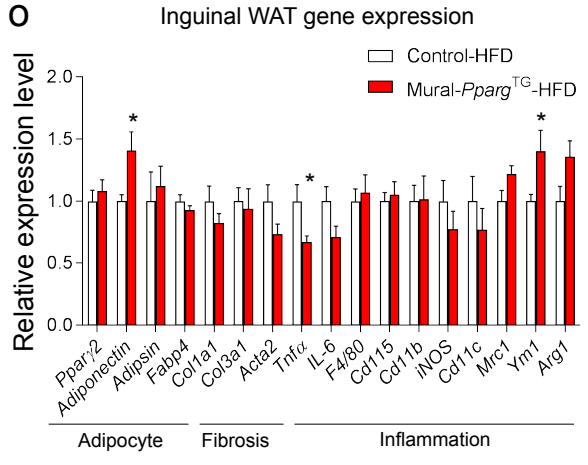

#### **Supplementary Figure 4: Inguinal and mesenteric WAT depots from obese Mural-*Pparg*<sup>TG</sup> mice**

**(a-h)** Representative 63x magnification confocal immunofluorescence images of **(a-d)** inguinal and **(e-h)** mesenteric WAT sections from MuralChaser-*Pparg*<sup>TG</sup> mice after 16 weeks dox-diet feeding. Sections were stained with anti-GFP (green) and anti-Perilipin (red) antibodies and counterstained with DAPI (blue; nuclei). Scale bar, 50  $\mu$ m.

**(i-l)** Representative immunofluorescence staining of Perilipin (green) and Mac-2 (red) in **(i-j)** inguinal and **(k-l)** mesenteric WAT paraffin sections obtained from control and Mural-*Pparg*<sup>TG</sup> mice after 16 weeks of dox-HFD feeding. Scale bar, 200  $\mu$ m.

**(m)** Number of crown-like structures (Mac-2 positive) in the indicated depots from control and Mural-*Pparg*<sup>TG</sup> mice after 16 weeks of dox-HFD feeding. \* denotes  $p < 0.05$  from Welch's t-test.  $n = 24$  randomly chosen 10x magnification fields from 6 individual animals. Bars represent mean  $\pm$  s.e.m.

**(n)** Average adipocyte size in indicated fat depots from control and Mural-*Pparg*<sup>TG</sup> mice after 16 weeks of dox-diet feeding. Control-HFD,  $n = 8$ ; Mural-*Pparg*<sup>TG</sup> -HFD,  $n = 9$ . Bars represent mean  $\pm$  s.e.m.

**(o)** Relative mRNA levels of indicted genes in inguinal WAT obtained from control and Mural-*Pparg*<sup>TG</sup> mice after 16 weeks of dox-HFD feeding. \* denotes  $p < 0.05$  from Welch's t-test.  $n = 6$  per genotype. Bars represent mean  $\pm$  s.e.m.

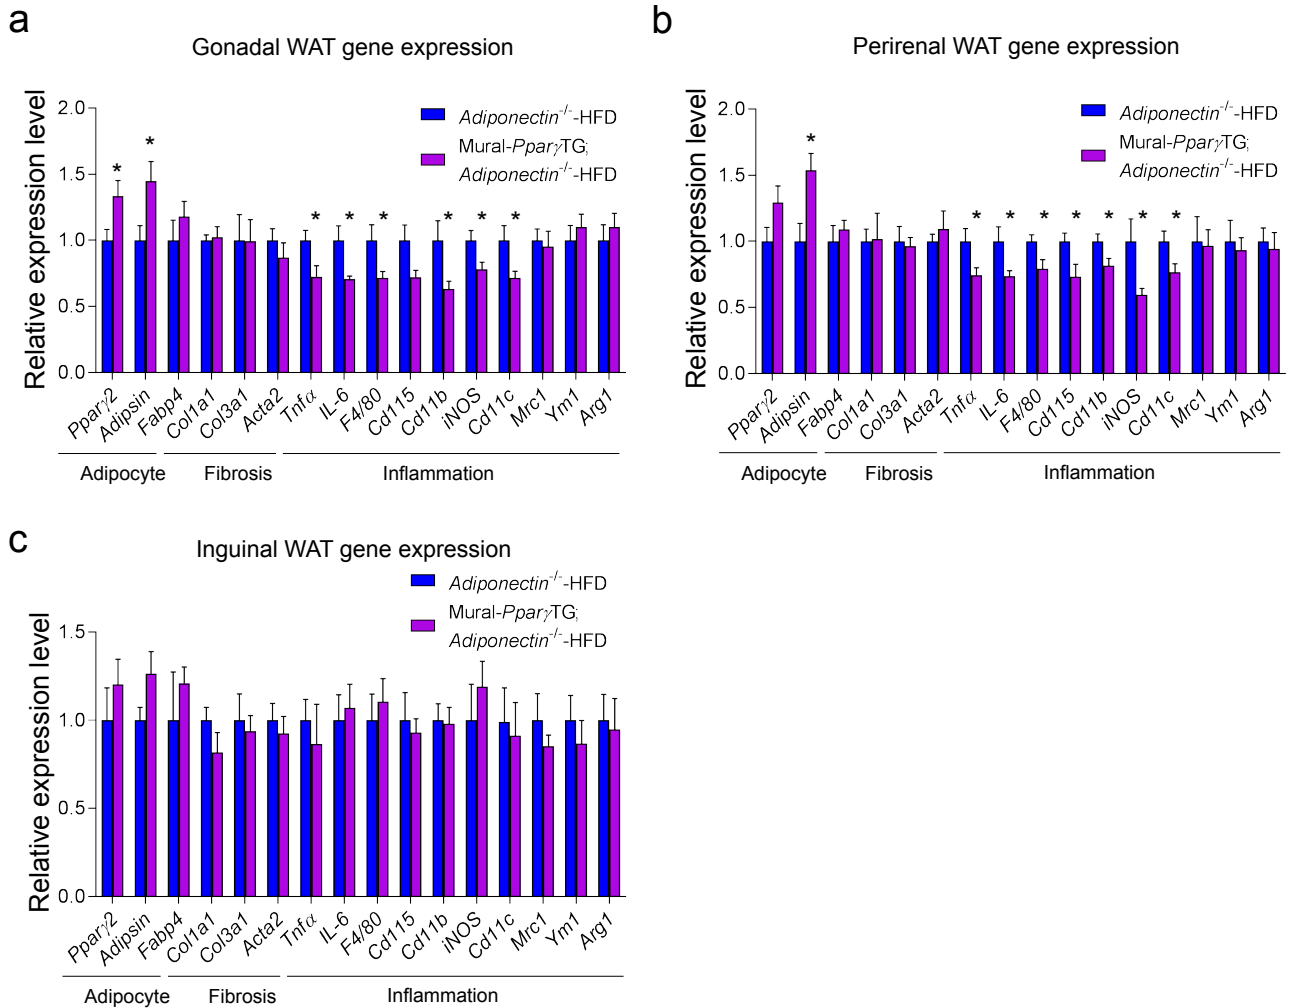

**Supplementary Figure 5: Adipose gene expression in obese *Adiponectin*<sup>-/-</sup> and *Adiponectin*<sup>-/-</sup>; *Mural-Pparg*<sup>TG</sup> mice.**

(a) Relative mRNA levels of indicated genes in gonadal WAT obtained from *Adiponectin*<sup>-/-</sup> and *Adiponectin*<sup>-/-</sup>; *Mural-Pparg*<sup>TG</sup> mice after 16 weeks of dox-HFD feeding. \* denotes p<0.05 from Welch's t-test. n=6 per genotype. Bars represent mean ± s.e.m.

(b) Relative mRNA levels of indicated genes in perirenal WAT obtained from *Adiponectin*<sup>-/-</sup> and *Adiponectin*<sup>-/-</sup>; *Mural-Pparg*<sup>TG</sup> mice after 16 weeks of dox-HFD feeding. \* denotes p<0.05 from Welch's t-test. n=6 per genotype. Bars represent mean ± s.e.m.

(c) Relative mRNA levels of indicated genes in inguinal WAT obtained from *Adiponectin*<sup>-/-</sup> and *Adiponectin*<sup>-/-</sup>; *Mural-Pparg*<sup>TG</sup> mice after 16 weeks of dox-HFD feeding. n=6 per genotype. Bars represent mean ± s.e.m.

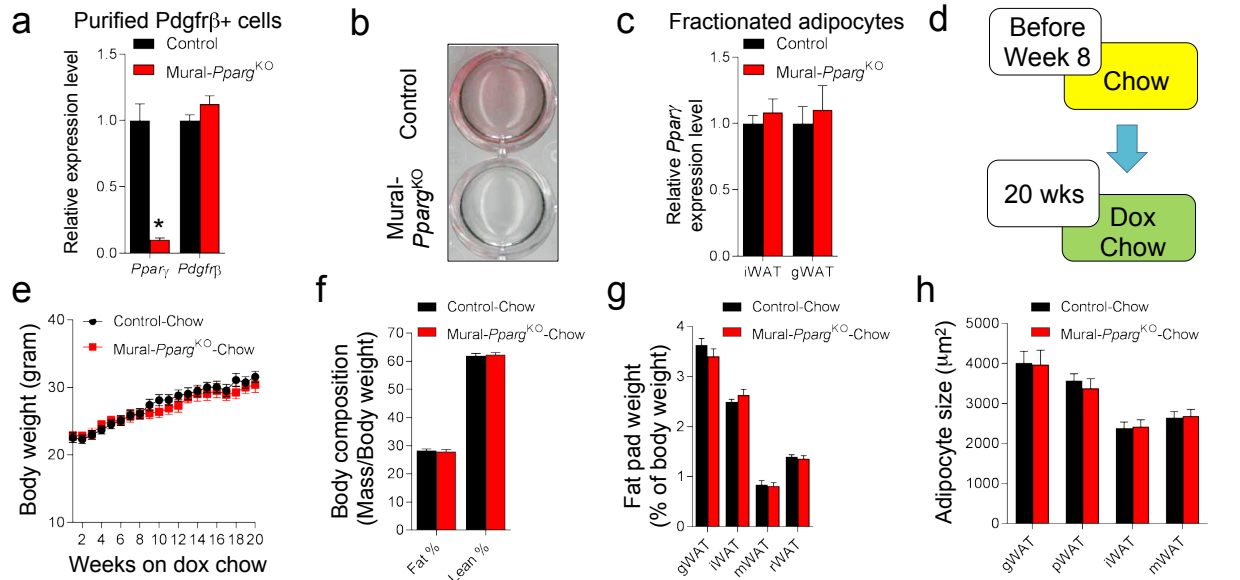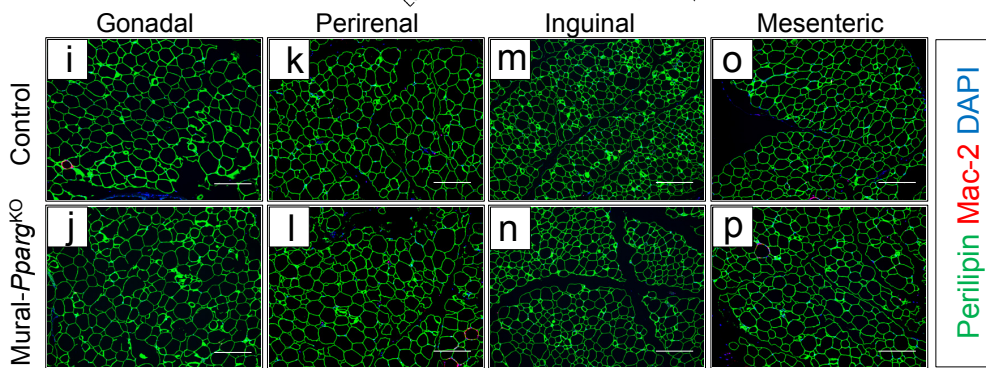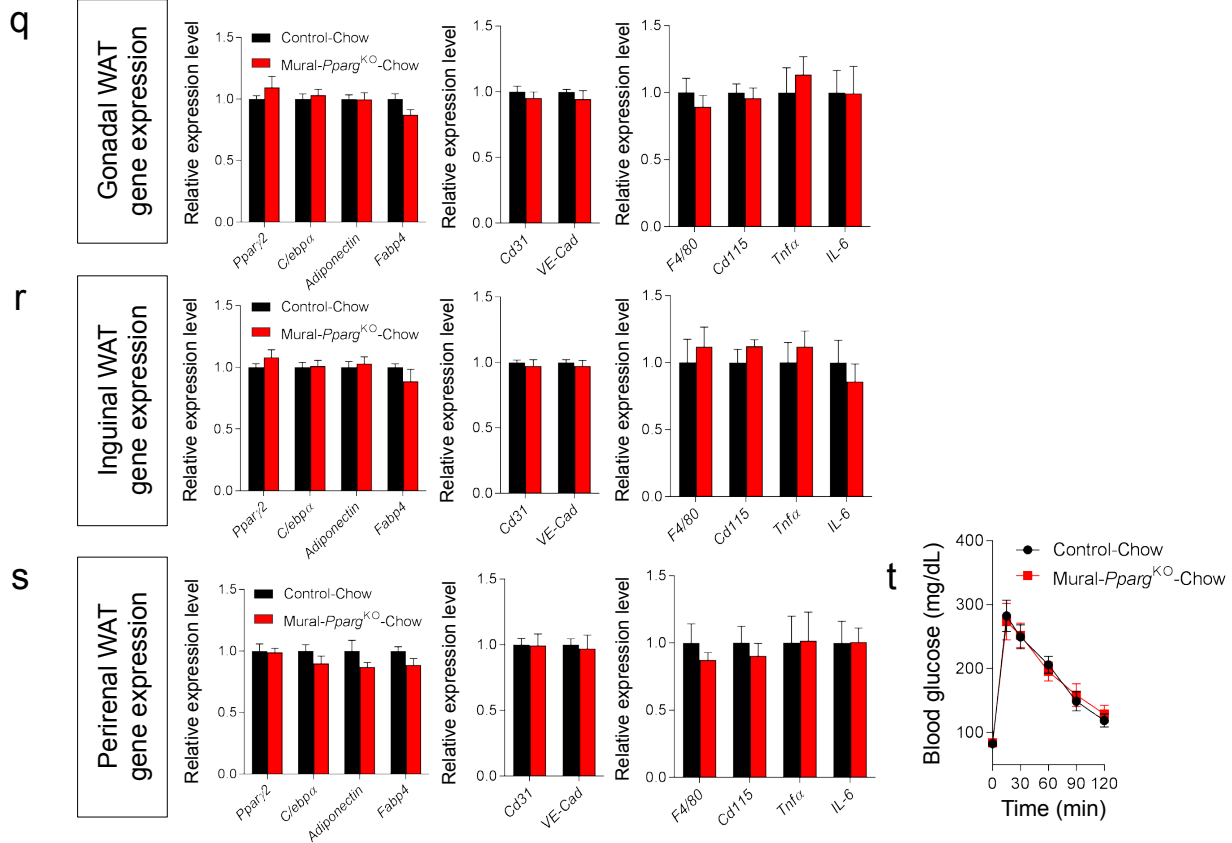

**Supplementary Figure 6: Mural *Pparg* is dispensable for WAT homeostasis in lean adult mice.**

**(a)** Relative mRNA levels of *Pparg* and *Pdgfrb* in  $\text{Pdgfr}\beta^+$ ;  $\text{Lin}^-$  ( $\text{CD31}^-/\text{CD45}^-$ ) cells isolated from iWAT of 8 weeks-old control and Mural-*Pparg*<sup>KO</sup> mice after 7 days of dox-chow feeding. \* denotes  $p < 0.05$  from Welch's t-test.  $n=3$  per genotype. Bars represent mean  $\pm$  s.e.m.

**(b)** Oil red staining of adipocytes (differentiation day 7) differentiated from iWAT  $\text{Pdgfr}\beta^+$ ;  $\text{Lin}^-$  cells isolated from 8 weeks-old control and Mural-*Pparg*<sup>KO</sup> mice after 7 days of dox-chow feeding.

**(c)** Relative mRNA levels of *Pparg* in fractionated adipocytes isolated from iWAT or gWAT of 8 weeks-old control and Mural-*Pparg*<sup>KO</sup> mice after 7 days of dox-chow feeding.  $n=4$  per genotype. Bars represent mean  $\pm$  s.e.m.

**(d)** Control and Mural-*Pparg*<sup>KO</sup> animals were kept at room temperature and fed on standard normal chow until 8 weeks of age before being switched to dox-containing chow for another 20 weeks.

**(e)** Body weights of control and Mural-*Pparg*<sup>KO</sup> mice during 20 weeks of dox-chow feeding. Control-Chow,  $n=8$ ; Mural-*Pparg*<sup>KO</sup>-Chow,  $n=7$ . Data points represent mean  $\pm$  s.e.m.

**(f)** Fat mass and lean mass (normalized to body weight) of control and Mural-*Pparg*<sup>KO</sup> mice after 20 weeks of dox-chow feeding. Control-Chow,  $n=8$ ; Mural-*Pparg*<sup>KO</sup>-Chow,  $n=7$ . Bars represent mean  $\pm$  s.e.m.

**(g)** Fat pad weight (normalized to body weight) of control and Mural-*Pparg*<sup>KO</sup> mice after 20 weeks of dox-chow feeding. Control-Chow,  $n=8$ ; Mural-*Pparg*<sup>KO</sup>-Chow,  $n=7$ . Bars represent mean  $\pm$  s.e.m.

**(h)** Average adipocyte size in indicated fat depots from control and Mural-*Pparg*<sup>KO</sup> mice after 20 weeks of dox-chow feeding.  $n=6$  per genotype. Bars represent mean  $\pm$  s.e.m.

**(i-p)** Representative immunofluorescence staining of Perilipin (green) and Mac-2 (red) in **(i-j)** gonadal, **(k-l)** perirenal, **(m-n)** inguinal and **(o-p)** mesenteric WAT paraffin sections obtained from control and Mural-*Pparg*<sup>KO</sup> mice after 20 weeks of dox-chow diet feeding. Scale bar, 200  $\mu\text{m}$ .

**(q-s)** Relative mRNA levels of indicated genes in **(m)** gonadal, **(n)** inguinal and **(o)** perirenal WAT obtained from control and Mural-*Pparg*<sup>KO</sup> mice after 20 weeks of dox-chow diet feeding.  $n=6$  per genotype. Bars represent mean  $\pm$  s.e.m.

**(t)** Glucose tolerance tests of control and Mural-*Pparg*<sup>KO</sup> mice after 20 weeks of dox-chow feeding. Control-Chow,  $n=8$ ; Mural-*Pparg*<sup>KO</sup>-Chow,  $n=7$ . Data points represent mean  $\pm$  s.e.m.

**a**

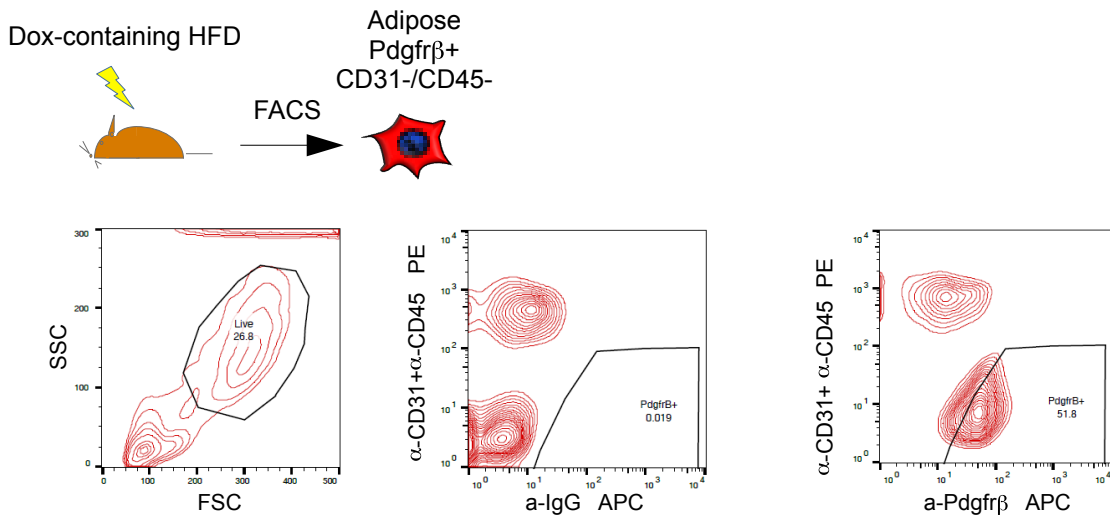

**b**

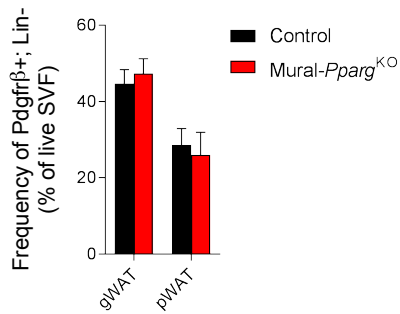

**c**

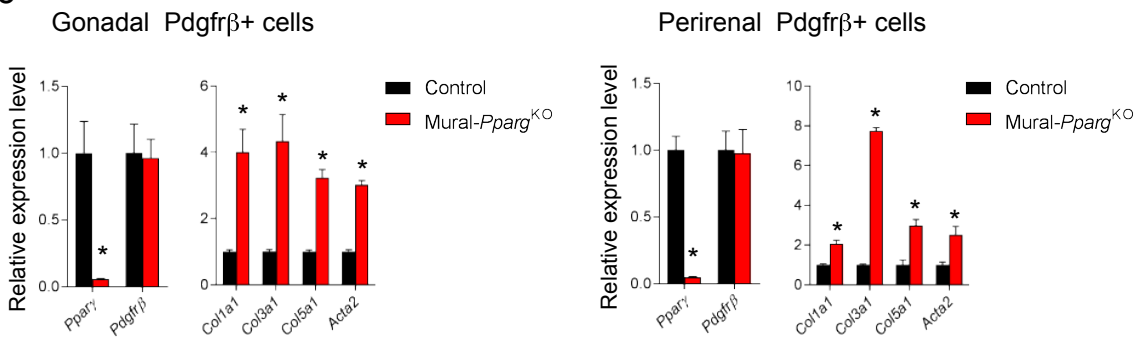

**d**

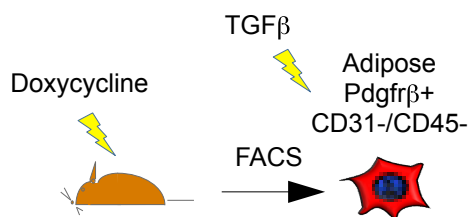

**e**

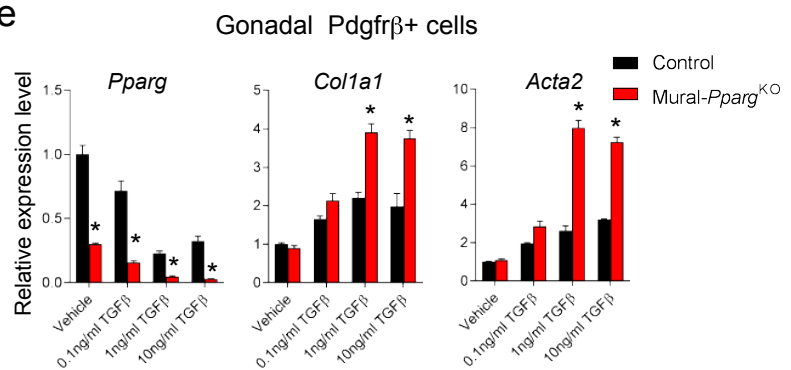



**Supplementary Figure 7: *Pparg*-deficient *Pdgfrβ*<sup>+</sup> cells adopt a myofibroblast-like phenotype.**

**(a)** *Pdgfrβ*<sup>+</sup>; *Lin*<sup>-</sup> cells were isolated from fat depots of control and Mural-*Pparg*<sup>KO</sup> mice after 20 weeks of dox-HFD feeding. 100,000 *Pdgfrβ*<sup>+</sup>; *Lin*<sup>-</sup> cells isolated from pooled stromal vascular cells of 2 individual fat depots were utilized for subsequent qPCR analysis and considered as one individual measurement. Representative FACS collection gates for the isolation of *Pdgfrβ*<sup>+</sup>; *Lin*<sup>-</sup> cells are shown.

**(b)** Frequency of *Pdgfrβ*<sup>+</sup>; *Lin*<sup>-</sup> cells among live SVF cells isolated from the indicated fat depots. n=3 per genotype. Bars represent mean ± s.e.m.

**(c)** Relative mRNA levels of *Pparg*, *Pdgfrb*, and the indicated fibrosis-related genes in *Pdgfrβ*<sup>+</sup>; *Lin*<sup>-</sup> cells isolated from gonadal WAT and perirenal WAT of control and Mural-*Pparg*<sup>KO</sup> mice after 20 weeks of dox-HFD feeding. \* denotes p<0.05 from Welch's t-test. n=3 per genotype. Bars represent mean ± s.e.m.

**(d)** Control and Mural-*Pparg*<sup>KO</sup> animals were kept at room temperature and fed on standard normal chow until 8 weeks of age before being switched to dox-containing chow for 7 days. *Pdgfrβ*<sup>+</sup>; *Lin*<sup>-</sup> cells isolated from gonadal WAT of control and Mural-*Pparg*<sup>KO</sup> mice after dox-chow feeding were cultured and treated with TGFβ for 3 days.

**(e)** Relative mRNA levels of the indicated genes after TGFβ treatment of *Pdgfrβ*<sup>+</sup>; *Lin*<sup>-</sup> cells isolated from gonadal WAT of control and Mural-*Pparg*<sup>KO</sup> mice. \* denotes p<0.05 from Student's t-test. n=3 per genotype. Bars represent mean ± s.e.m.

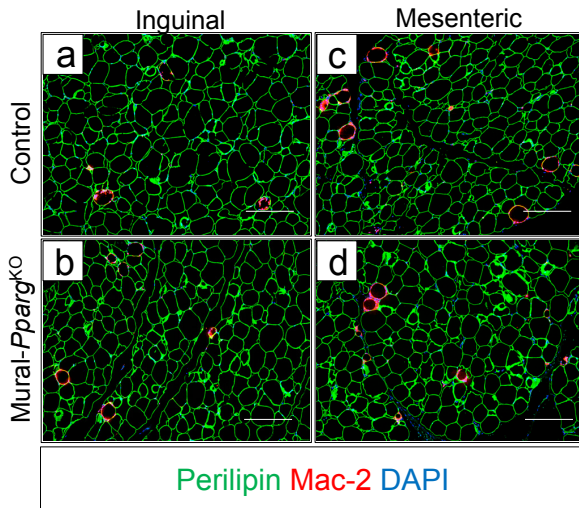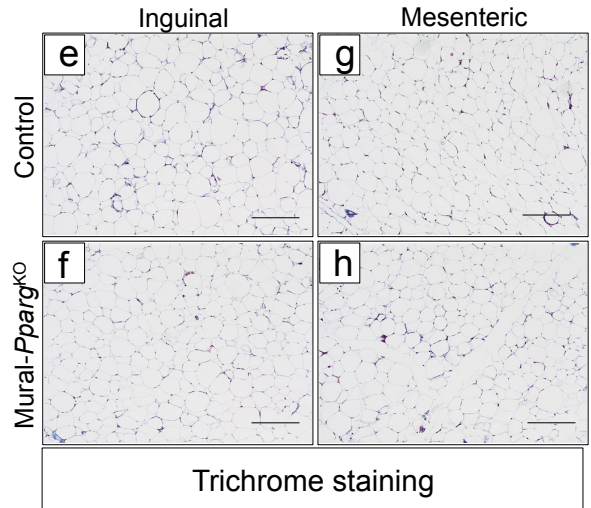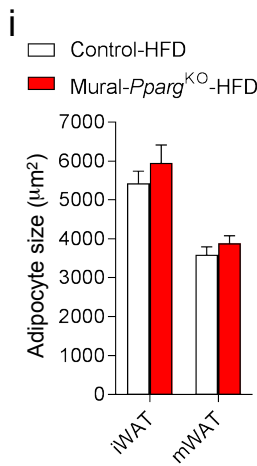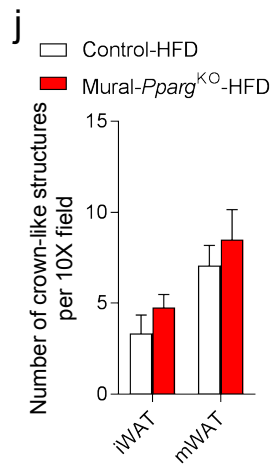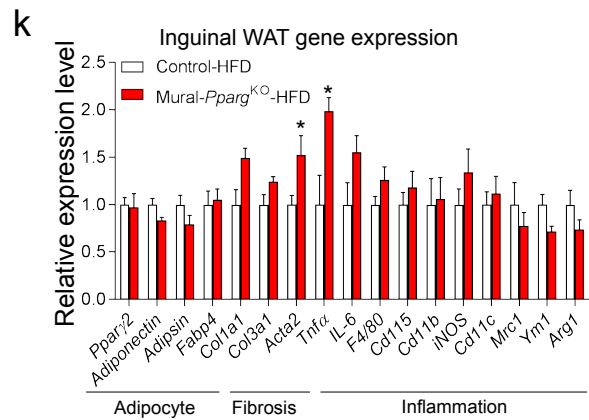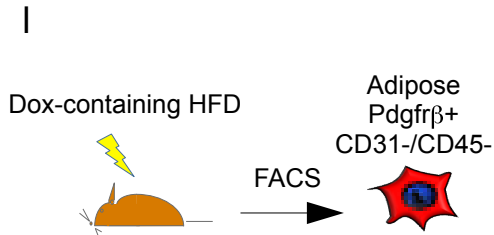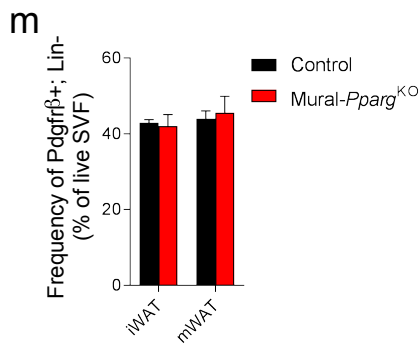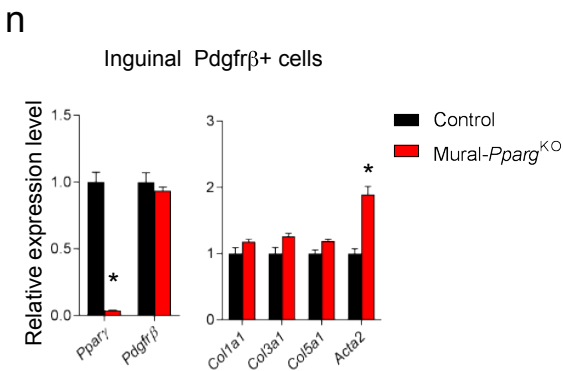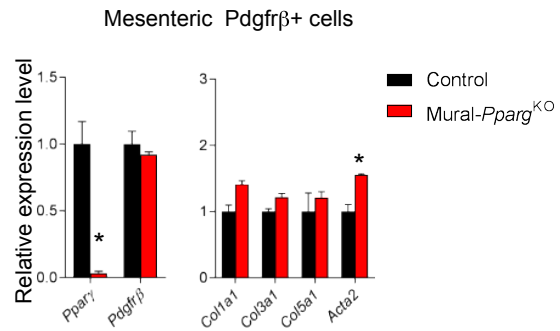

## Supplementary Figure 8: Inguinal and mesenteric WAT depots from obese Mural-*Pparg*<sup>KO</sup> mice

**(a-d)** Representative immunofluorescence staining of Perilipin (green) and Mac-2 (red) in **(a-b)** inguinal and **(c-d)** mesenteric WAT paraffin sections obtained from control and Mural-*Pparg*<sup>KO</sup> mice after 20 weeks of dox-HFD feeding. Scale bar, 200  $\mu$ m.

**(e-h)** Representative trichrome staining of **(e-f)** inguinal and **(g-h)** mesenteric WAT paraffin sections obtained from control and Mural-*Pparg*<sup>KO</sup> mice after 20 weeks of dox-HFD feeding. Scale bar, 200  $\mu$ m.

**(i)** Number of crown-like structures (Mac-2 positive) in the indicated depots obtained from control and Mural-*Pparg*<sup>KO</sup> mice after 20 weeks of dox-HFD feeding. n=24 randomly chosen 10x magnification fields from 6 individual animals. Bars represent mean  $\pm$  s.e.m.

**(j)** Average adipocyte size in indicated fat depots from control and Mural-*Pparg*<sup>KO</sup> mice after 20 weeks of dox-HFD feeding. Control-HFD, n=8; Mural-*Pparg*<sup>KO</sup>-HFD, n=7. Bars represent mean  $\pm$  s.e.m.

**(k)** Relative mRNA levels of indicated genes in inguinal WAT obtained from control and Mural-*Pparg*<sup>KO</sup> mice after 20 weeks of dox-HFD diet feeding. \* denotes p<0.05 from Welch's t-test. n=6 per genotype. Bars represent mean  $\pm$  s.e.m.

**(l)** Pdgfr $\beta$ <sup>+</sup>; Lin<sup>-</sup> cells were isolated from inguinal and mesenteric fat depots of control and Mural-*Pparg*<sup>KO</sup> mice after 20 weeks of dox-HFD feeding and analyzed as described in Supplemental Figure 7a.

**(m)** Frequency of Pdgfr $\beta$ <sup>+</sup>; Lin<sup>-</sup> cells among live SVF cells isolated from the indicated fat depots. Bars represent mean  $\pm$  s.e.m.

**(n)** Relative mRNA levels of *Pparg*, *Pdgfrb*, and the indicated fibrosis-related genes in Pdgfr $\beta$ <sup>+</sup>; Lin<sup>-</sup> cells isolated from inguinal WAT and mesenteric WAT of control and Mural-*Pparg*<sup>KO</sup> mice after 20 weeks of dox-HFD feeding. \* denotes p<0.05 from Student's t-test. n=3 per genotype. Bars represent mean  $\pm$  s.e.m.

## 10 weeks HFD

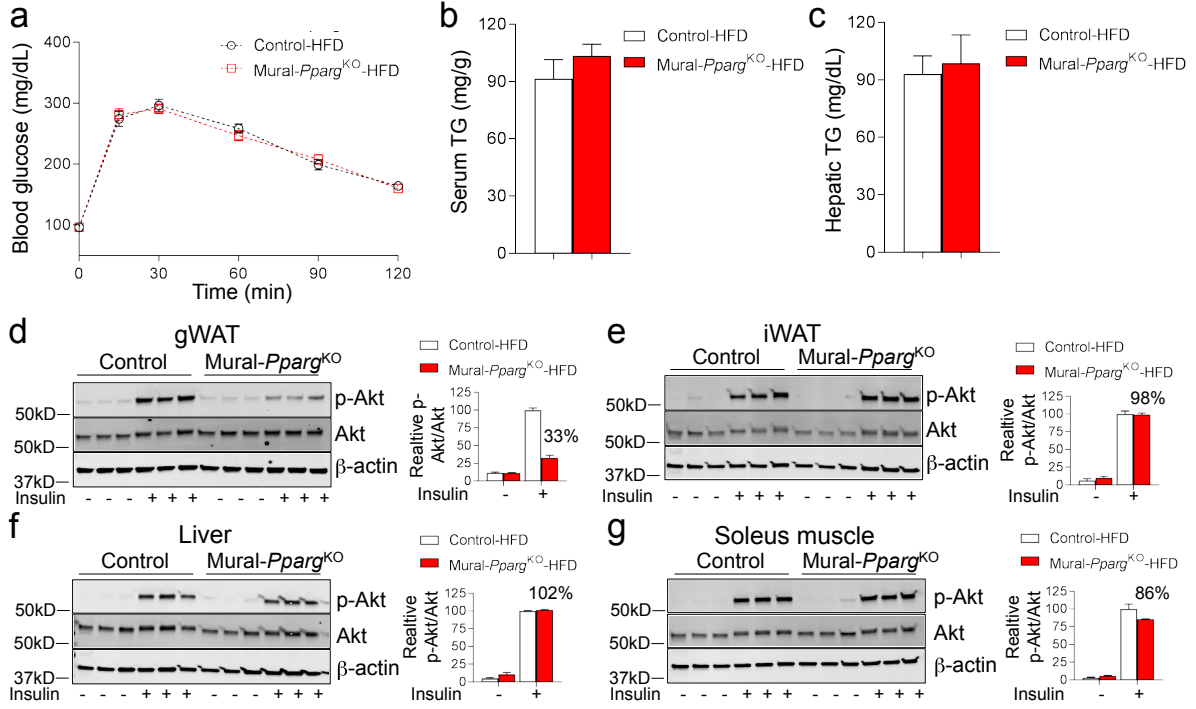

## 20 weeks HFD

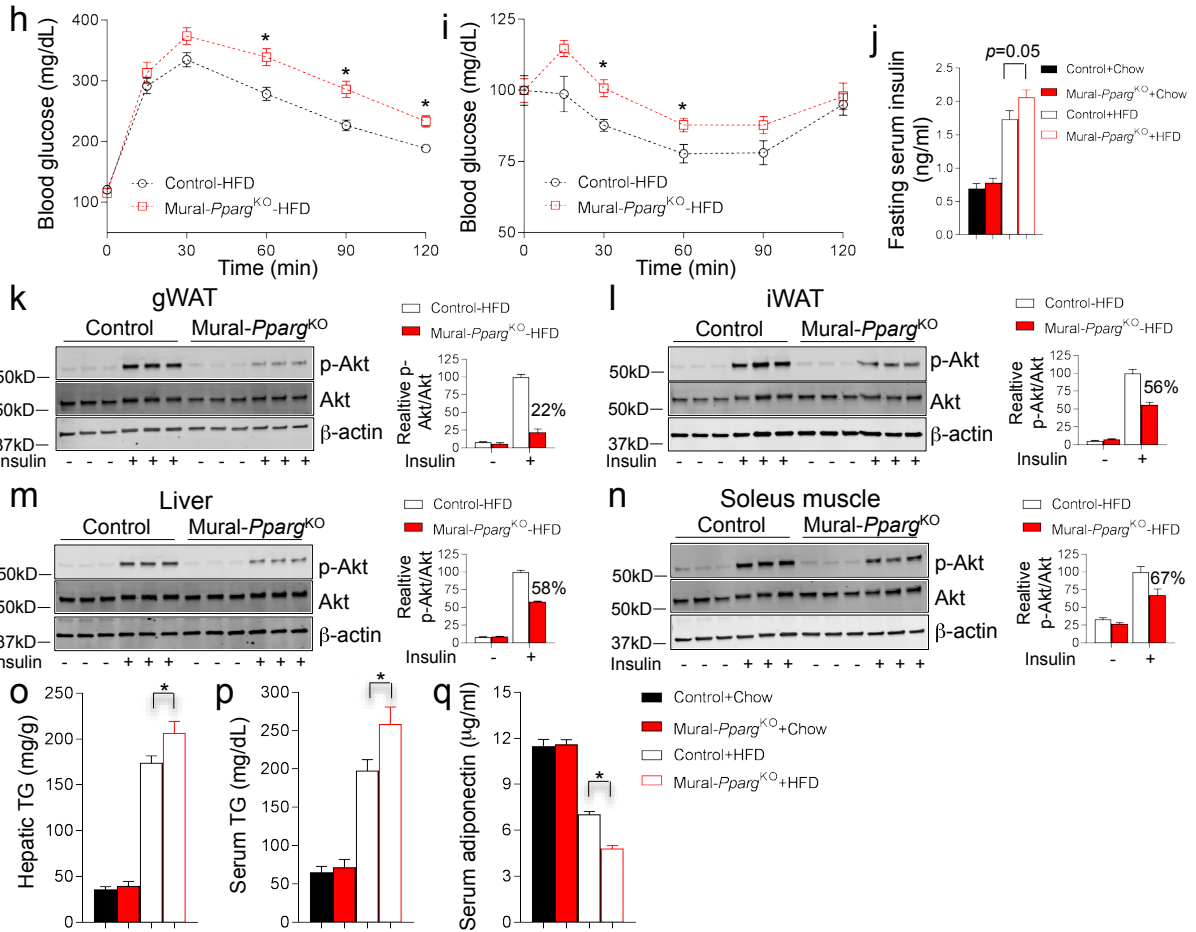

**Supplementary Figure 9: Obese Mural-*Pparg*<sup>KO</sup> mice are glucose intolerant and insulin resistant.**

**(a)** Glucose tolerance tests of control and Mural-*Pparg*<sup>KO</sup> mice after 10 weeks of dox-HFD feeding. Control-HFD, n=14; Mural-*Pparg*<sup>KO</sup>-HFD, n=13. Data points represent mean  $\pm$  s.e.m.

**(b)** Serum and **(c)** hepatic triglycerides levels in control and Mural-*Pparg*<sup>KO</sup> mice after 10 weeks of dox-HFD feeding. n=5 per genotype. Bars represent mean  $\pm$  s.e.m.

**(d-g)** Western blot analysis of phosphorylated Akt (p-Akt), total Akt, and b-actin protein levels in tissue extracts of **(d)** gonadal WAT, **(e)** inguinal WAT, **(f)** liver and **(g)** soleus muscle, from control and Mural-*Pparg*<sup>KO</sup> mice after 10 weeks of dox-HFD feeding. For quantification, the intensity of p-Akt band is normalized to that of total Akt band. The mean values of pAkt/Akt intensity ratio of insulin-treated control mice samples were set as 100%. n=3 individual mice per genotype. Bars represent mean  $\pm$  s.e.m.

**(h)** Glucose tolerance tests of control and Mural-*Pparg*<sup>KO</sup> mice after 20 weeks of dox-HFD feeding. \* denotes p<0.05 from Student's t-test. Control-HFD, n=14; Mural-*Pparg*<sup>KO</sup>-HFD, n=13. Data points represent mean  $\pm$  s.e.m.

**(i)** Insulin tolerance test of control and Mural-*Pparg*<sup>KO</sup> mice after 20 weeks of dox-HFD feeding. \* denotes p<0.05 from Student's t-test. Control-HFD, n=14; Mural-*Pparg*<sup>KO</sup>-HFD, n=13. Data points represent mean  $\pm$  s.e.m.

**(j)** 6-hour fasting serum insulin levels in control and Mural-*Pparg*<sup>KO</sup> mice after 20 weeks of dox-HFD feeding. Control-Chow, n=8; Mural-*Pparg*<sup>KO</sup>-Chow, n=7; Control-HFD, n=8; Mural-*Pparg*<sup>KO</sup>-HFD, n=7. Bars represent mean  $\pm$  s.e.m.

**(k-n)** Western blot analysis of phosphorylated Akt (p-Akt), total Akt and b-actin protein levels in tissue extracts of **(k)** gonadal WAT, **(l)** inguinal WAT, **(m)** liver and **(n)** soleus muscle from control and Mural-*Pparg*<sup>KO</sup> mice after 20 weeks of dox-HFD feeding. For quantification, the intensity of p-Akt band is normalized to that of total Akt band. The mean values of pAkt/Akt intensity ratio of insulin-treated control mice samples were set as 100%. n=3 individual mice per genotype. Bars represent mean  $\pm$  s.e.m.

**(o)** Hepatic and **(p)** serum triglycerides levels in control and Mural-*Pparg*<sup>KO</sup> mice after 20 weeks of dox-diet feeding. Two-way ANOVA, \*p< 0.05; Control-Chow, n=8; Mural-*Pparg*<sup>KO</sup>-Chow, n=7; Control-HFD, n=8; Mural-*Pparg*<sup>KO</sup>-HFD, n=7. Bars represent mean  $\pm$  s.e.m.

**(q)** Serum adiponectin levels in control and Mural-*Pparg*<sup>KO</sup> mice after 20 weeks of dox-diet feeding. Two-way ANOVA, \*p< 0.05; Control-Chow, n=8; Mural-*Pparg*<sup>KO</sup>-Chow, n=7; Control-HFD, n=14; Mural-*Pparg*<sup>KO</sup>-HFD, n=13. Bars represent mean  $\pm$  s.e.m.

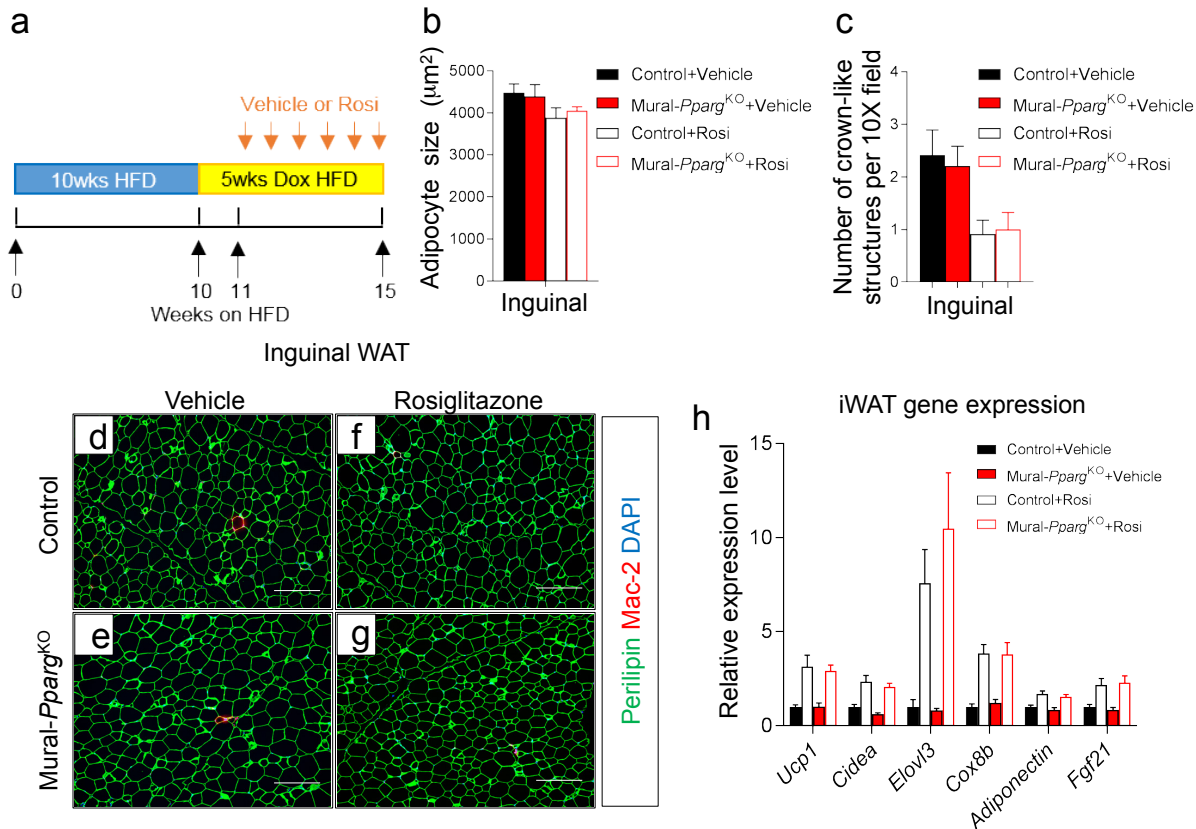

## Supplementary Figure 10: Analysis of inguinal WAT from obese TZD-treated *Mural-Pparg*<sup>KO</sup> mice

**(a)** Control and *Mural-Pparg*<sup>KO</sup> mice were fed on standard chow diet until 6 weeks of age before being switched to HFD for 10 week. Mice were then fed dox-containing HFD for another 5 weeks. After 1 week of dox-HFD, vehicle (1% methylcellulose) or rosiglitazone (10mg/kg/day) were administered daily to the animals for 4 weeks by oral gavage.

**(b)** Average adipocyte size in inguinal WAT from control and *Mural-Pparg*<sup>KO</sup> mice treated with vehicle or rosiglitazone. Control+Vehicle, n=6; *Mural-Pparg*<sup>KO</sup> +Vehicle, n=6; Control+Rosi, n=7; *Mural-Pparg*<sup>KO</sup> +Rosi, n=8. Bars represent mean  $\pm$  s.e.m.

**(c)** Number of crown-like structures (Mac-2 positive) in inguinal WAT from control and *Mural-Pparg*<sup>KO</sup> mice treated with vehicle or rosiglitazone. n=24 randomly chosen 10x magnification fields from 6 individual animals. Bars represent mean  $\pm$  s.e.m.

**(d-g)** Representative immunofluorescence staining of Perilipin (green) and Mac-2 (red) in inguinal WAT paraffin sections obtained from control and *Mural-Pparg*<sup>KO</sup> mice after 4 weeks of vehicle or rosiglitazone treatment. Scale bar, 200  $\mu\text{m}$ .

**(h)** Relative mRNA levels of indicated rosiglitazone-induced genes in inguinal WAT obtained from control and *Mural-Pparg*<sup>KO</sup> mice treated with vehicle or rosiglitazone. n=6 per group. Bars represent mean  $\pm$  s.e.m.

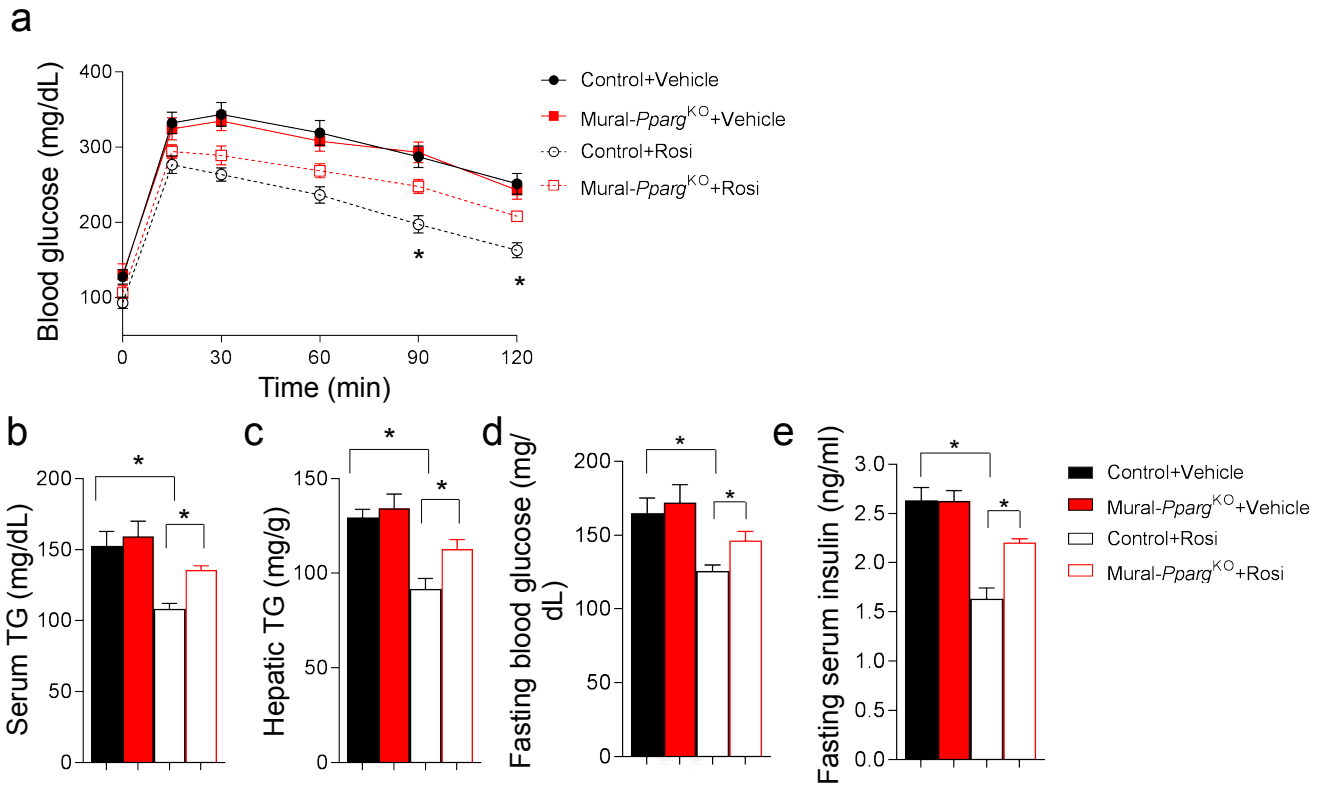

**Supplementary Figure 11: Mural cell *Pparg* is required for the full metabolic benefit of rosiglitazone.**

**(a)** Glucose tolerance tests of obese control and Mural-*Pparg*<sup>KO</sup> mice after 4 weeks of vehicle or rosiglitazone treatment. Two-way ANOVA, \* $p < 0.05$ ; Control+Vehicle,  $n=8$ ; Mural-*Pparg*<sup>KO</sup> +Vehicle,  $n=8$ ; Control+Rosi,  $n=8$ ; Mural-*Pparg*<sup>KO</sup> +Rosi,  $n=9$ . Data points represent mean  $\pm$  s.e.m.

**(b)** Serum and **(c)** hepatic triglycerides levels in obese control and Mural-*Pparg*<sup>KO</sup> mice after 4 weeks of vehicle or rosiglitazone treatment. Two-way ANOVA, \* $p < 0.05$ ; Control+Vehicle,  $n=8$ ; Mural-*Pparg*<sup>KO</sup> +Vehicle,  $n=8$ ; Control+Rosi,  $n=8$ ; Mural-*Pparg*<sup>KO</sup> +Rosi,  $n=9$ . Bars represent mean  $\pm$  s.e.m.

**(d)** 6-hour fasting blood glucose levels of obese control and Mural-*Pparg*<sup>KO</sup> mice treated with vehicle or rosiglitazone. Two-way ANOVA, \* $p < 0.05$ . Control+Vehicle,  $n=8$ ; Mural-*Pparg*<sup>KO</sup> +Vehicle,  $n=9$ ; Control+Rosi,  $n=11$ ; Mural-*Pparg*<sup>KO</sup> +Rosi,  $n=19$ . Bars represent mean  $\pm$  s.e.m.

**(e)** 6-hour fasting serum insulin levels of control and Mural-*Pparg*<sup>KO</sup> mice treated with vehicle or rosiglitazone. Two-way ANOVA, \* $p < 0.05$ . Control+Vehicle,  $n=8$ ; Mural-*Pparg*<sup>KO</sup> +Vehicle,  $n=8$ ; Control+Rosi,  $n=8$ ; Mural-*Pparg*<sup>KO</sup> +Rosi,  $n=9$ . Bars represent mean  $\pm$  s.e.m.

**Caloric Excess**  
**Energy Intake > Energy Expenditure**

**“Unhealthy” WAT Expansion**

**Adipocyte Hypertrophy**

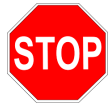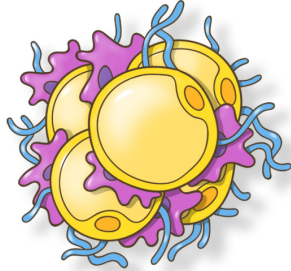

↑ Inflammation  
 ↑ Fibrosis  
 ↓ Adiponectin  
*Insulin Resistance*

**De novo adipogenesis**  
 from **Perivascular cells**

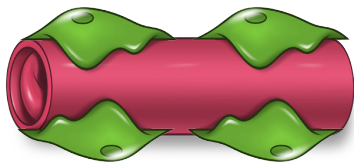

*Zfp423*<sup>+</sup>  
*Pparg*<sup>+</sup>  
*Pdgfrb*<sup>+</sup>

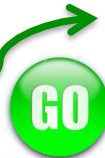

**Adipocyte Hyperplasia**

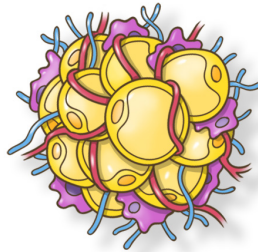

↓ Inflammation  
*Insulin Sensitivity*  
 ↑↑ Adiponectin

**“Healthy” WAT Expansion**

**TZDs**

**Supplementary Figure 12: Proposed Model.**

We propose that the adipogenic capacity of *Pdgfrβ*<sup>+</sup> mural cells determines visceral WAT health and serum adiponectin levels in obesity. Committed mural (*Pdgfrβ*<sup>+</sup>) adipocyte precursors reside in adipose depots of adult mice and can be defined by the expression of *Pparg* and its upstream regulator, *Zfp423*. In the setting of caloric excess (high-fat diet), *Pdgfrβ*<sup>+</sup> precursors undergo white adipocyte differentiation in visceral WAT depots. The inability of these cells to undergo adipogenesis (e.g. loss of *Pparg* expression) leads to a pathological expansion of WAT, characterized predominantly by macrophage infiltration, tissue fibrosis, reduced tissue insulin sensitivity, and loss of adiponectin production. Driving adipocyte differentiation from *Pdgfrβ*<sup>+</sup> mural cells (e.g. *Pparg* overexpression or activation by TZDs) leads to visceral adipocyte hyperplasia at the expense of adipocyte hypertrophy. This healthy visceral WAT remodeling is associated with less inflammation, maintenance of tissue insulin sensitivity, and a preservation of adiponectin levels. Graphic illustrations of adipose tissue were reproduced from *Molecular and Cellular Endocrinology*, Vol 445: 95-108, 2017, with permission from Elsevier.





**Supplementary Table 1: Sequences of qPCR primers used in this study**

| Gene               | Forward 5'-3'           | Reverse 5'-3'           |
|--------------------|-------------------------|-------------------------|
| <i>Pparg2</i>      | GCATGGTGCCTTCGCTGA      | TGGCATCTCTGTGTCAACCATG  |
| <i>Cebpa</i>       | TGGCCTGGAGACGCAATGA     | CGCAGAGATTGTGCGTCTTT    |
| <i>Adiponectin</i> | AGATGGCACTCCTGGAGAGAA   | TTCTCCAGGCTCTCCTTTCT    |
| <i>Fabp4</i>       | GATGAAATCACCGCAGACGAC   | ATTCCACCACCAGCTTGTAC    |
| <i>Adipsin</i>     | CTACATGGCTTCCGTGCAAGT   | AGTCGTCATCCGTCACTCCAT   |
| <i>Ucp1</i>        | TCTCAGCCGGCTTAATGACTG   | GGCTTGCATTCTGACCTTCAC   |
| <i>Fgf21</i>       | CTGCTGGGGGTCTACCAAG     | CTGCGCCTACCACTGTTCC     |
| <i>Elovl3</i>      | GTGTGCTTTGCCATCTACACG   | CTCCCAGTTCAACAACCTTGC   |
| <i>Cidea</i>       | TCCTATGCTGCACAGATGACG   | TGCTCTTCTGTATCGCCCAGT   |
| <i>Cox8b</i>       | TGCTGGAACCATGAAGCCAAC   | AGCCAGCCAAAACCTCCCACTT  |
| <i>Col1a1</i>      | AGATGATGGGGAAGCTGGCAA   | AAGCCTCGGTGTCCCTTCATT   |
| <i>Col3a1</i>      | ATTCTGCCACCCCGAACTCAA   | ACAGTCATGGGGCTGGCATTT   |
| <i>Col5a1</i>      | TGTCATGTTTGGCTCCCGGAT   | AGTCATAGGCAGCTCGGTTGT   |
| <i>Acta2</i>       | TGACGCTGAAGTATCCGATAGA  | GTACGTCCAGAGGCATAGAGG   |
| <i>Tnfa</i>        | CCTGTAGCCCACGTCTAG      | GGGAGTAGACAAGGTACAACCC  |
| <i>IL6</i>         | TAGTCCTTCCTACCCCAATTTCC | TTGGTCCTTAGCCACTCCTTC   |
| <i>F4/80</i>       | TGACTCACCTTGTGGTCCTAA   | CTTCCCAGAATCCAGTCTTTCC  |
| <i>Cd115</i>       | TGTCATCGAGCCTAGTGGC     | CGGGAGATTCAGGGTCCAAG    |
| <i>Cd11b</i>       | GGCTCCGGTAGCATCAACAA    | ATCTTGGGCTAGGGTTTCTCT   |
| <i>iNOS</i>        | ACATCGACCCGTCCACAGTAT   | CAGAGGGGTAGGCTTGTCTC    |
| <i>Cd11c</i>       | GTGCTGAGTTCGGACACAGT    | AGAGGCCACCTATTTGGTTAGT  |
| <i>Mrc1</i>        | CTCTGTTTCAGCTATTGGACGC  | CGGAATTTCTGGGATTCAGCTTC |
| <i>Ym1</i>         | CAGGTCTGGCAATTCTTCTGAA  | GTCTTGCTCATGTGTGTAAGTGA |
| <i>Arg1</i>        | CTCCAAGCCAAAGTCCTTAGAG  | AGGAGCTGTCATTAGGGACATC  |
| <i>Cd31</i>        | ACGCTGGTGCTCTATGCAAG    | TCAGTTGCTGCCCATTCATCA   |
| <i>VE-Cad</i>      | CCAACGTGAACCGCCAGAA     | GTGTTAGCATCGACCCCGAA    |
| <i>Pdgfrb</i>      | CAAGAAGCGGCCATGAATCAG   | CGGCCCTAGTGAGTTGTTGT    |
| <i>Rps18</i>       | CATGCAAACCCACGACAGTA    | CCTCACGCAGCTTGTTGTCTA   |
